# Supplementary material for: Mitochondrial biogenesis, telomere length and cellular senescence in Parkinson’s disease and Lewy body dementia
Source: PubMed Central journal article supplement (PMC9584960; doi:10.1038/s41598-022-22400-z), 2022-10-20
Supplement: 41598_2022_22400_MOESM1_ESM.pdf [file 41598_2022_22400_MOESM1_ESM.pdf]

## Supplementary Material

**Table S1.** Association between *mtDNA copy number*, telomere length and LEDD in blood in Parkinson patients (multivariate Anova).

|                                 | <i>Est.</i> | <i>SE</i> | <i>df</i> | <i>t ratio</i> | <i>p</i>     |
|---------------------------------|-------------|-----------|-----------|----------------|--------------|
| <b><i>mtDNA copy number</i></b> |             |           |           |                |              |
| Sex                             | -23.61      | 18.91     | 1         | -1.25          | 0.216        |
| Age                             | 1.094       | 1.925     | 63        | 0.57           | 0.572        |
| LEDD                            | -0.001      | 0.046     | 63        | -0.12          | 0.905        |
| <b><i>Telomere length</i></b>   |             |           |           |                |              |
| Sex                             | 0.332       | 0.135     | 1         | 2.64           | <b>0.016</b> |
| Age                             | 0.032       | 0.013     | 63        | 2.35           | <b>0.020</b> |
| LEDD                            | 0.001       | 0.0003    | 63        | 3.45           | <b>0.001</b> |

**Table S2.** Association between Disease duration, disease severity, telomere length, LEDD and *mtDNA copy number* in blood in Parkinson's patients (multivariate Anova).

|                                 | <i>Est.</i> | <i>SE</i> | <i>df</i> | <i>t ratio</i> | <i>p</i>     |
|---------------------------------|-------------|-----------|-----------|----------------|--------------|
| <b><i>Disease severity</i></b>  |             |           |           |                |              |
| Sex                             | 0.254       | 0.096     | 1         | 2.63           | <b>0.010</b> |
| Age                             | 0.003       | 0.010     | 62        | 0.30           | 0.764        |
| Disease duration                | 0.084       | 0.029     | 62        | 2.09           | <b>0.005</b> |
| <b><i>Telomere length</i></b>   |             |           |           |                |              |
| Sex                             | 0.370       | 0.136     | 1         | 2.72           | <b>0.008</b> |
| Age                             | 0.018       | 0.014     | 62        | 1.27           | 0.210        |
| Disease duration                | 0.127       | 0.041     | 62        | 3.11           | <b>0.002</b> |
| <b><i>LEDD</i></b>              |             |           |           |                |              |
| Sex                             | 0.332       | 0.135     | 1         | 2.64           | <b>0.016</b> |
| Age                             | 0.032       | 0.013     | 62        | -2.06          | <b>0.020</b> |
| Disease duration                | 0.001       | 0.0003    | 62        | 3.45           | <b>0.001</b> |
| <b><i>mtDNA copy number</i></b> |             |           |           |                |              |
| Sex                             | -116.92     | 54.07     | 1         | 2.16           | <b>0.034</b> |
| Age                             | -11.66      | 5.65      | 62        | -2.06          | <b>0.043</b> |
| Disease duration                | -11.05      | 16.27     | 62        | -0.68          | 0.499        |

**Table S3.** Association between *mtDNA copy number*, telomere length with clinical parameters (Hoehn and Yahr, MDS-UPDRS III, MADRS, HADS-Anxiety, HADS-Depression and MoCA).

|                                 | <i>Est.</i> | <i>SE</i> | <i>df</i> | <i>t ratio</i> | <i>p</i>     |
|---------------------------------|-------------|-----------|-----------|----------------|--------------|
| <b><i>mtDNA copy number</i></b> |             |           |           |                |              |
| Hoehn and Yahr                  |             |           |           |                |              |
| Sex                             | -101,5      | 53,47     | 1         | -1,90          | 0,062        |
| Age                             | -12,14      | 5,465     | 63        | -2,22          | <b>0,029</b> |
| Hoehn and Yahr                  | -44,96      | 60,41     | 63        | -0,74          | 0,459        |
| MDS-UPDRS III                   |             |           |           |                |              |
| Sex                             | -80,47      | 52,15     | 1         | -1,54          | 0,130        |
| Age                             | -0,038      | 6,505     | 41        | -0,01          | 0,995        |
| MDS-UPDRS III                   | -1,640      | 5,047     | 41        | -0,32          | 0,746        |
| MADRS                           |             |           |           |                |              |
| Sex                             | -102,1      | 52,44     | 1         | -1,95          | 0,055        |
| Age                             | -16,88      | 6,184     | 66        | -2,73          | <b>0,008</b> |
| MADRS                           | -2,950      | 6,022     | 66        | -0,49          | 0,625        |
| HADS-Anxiety                    |             |           |           |                |              |
| Sex                             | -113,7      | 52,38     | 1         | -2,17          | <b>0,033</b> |
| Age                             | -15,96      | 5,987     | 66        | -2,67          | <b>0,009</b> |
| HADS-Anxiety                    | 0,190       | 11,63     | 66        | 0,02           | 0,987        |
| HADS-Depression                 |             |           |           |                |              |
| Sex                             | -108,1      | 52,92     | 1         | -2,04          | <b>0,045</b> |
| Age                             | -16,74      | 6,106     | 65        | -2,74          | <b>0,007</b> |
| HADS-Depression                 | -2,609      | 11,09     | 65        | -0,24          | 0,814        |
| MoCA                            |             |           |           |                |              |
| Sex                             | -92,01      | 50,22     | 1         | -1,83          | 0,071        |
| Age                             | -12,59      | 5,825     | 67        | -2,16          | <b>0,034</b> |
| MoCA                            | 4,199       | 9,592     | 67        | 0,44           | 0,662        |
| <b><i>Telomere length</i></b>   |             |           |           |                |              |
| Hoehn and Yahr                  |             |           |           |                |              |
| Sex                             | 0,237       | 0,147     | 1         | 1,61           | 0,112        |
| Age                             | 0,029       | 0,015     | 63        | 1,96           | 0,054        |
| Hoehn and Yahr                  | 0,187       | 0,166     | 63        | 1,12           | 0,265        |
| MDS-UPDRS III                   |             |           |           |                |              |
| Sex                             | 0,412       | 0,141     | 1         | 2,92           | <b>0,005</b> |
| Age                             | 0,023       | 0,017     | 41        | 1,33           | 0,192        |
| MDS-UPDRS III                   | 0,010       | 0,013     | 41        | 0,73           | 0,469        |
| MADRS                           |             |           |           |                |              |
| Sex                             | 0,287       | 0,150     | 1         | 1,92           | 0,059        |
| Age                             | 0,035       | 0,017     | 66        | 2,01           | <b>0,048</b> |
| MADRS                           | 0,016       | 0,017     | 66        | 0,93           | 0,354        |
| HADS-Anxiety                    |             |           |           |                |              |
| Sex                             | 0,313       | 0,146     | 1         | 2,14           | <b>0,035</b> |
| Age                             | 0,034       | 0,016     | 66        | 2,09           | <b>0,040</b> |
| HADS-Anxiety                    | 0,017       | 0,032     | 66        | 0,52           | 0,601        |
| HADS-Depression                 |             |           |           |                |              |
| Sex                             | -0,326      | 0,142     | 1         | 2,29           | <b>0,025</b> |
| Age                             | 0,040       | 0,016     | 65        | 2,48           | <b>0,015</b> |
| HADS-Depression                 | 0,069       | 0,029     | 65        | 2,33           | <b>0,022</b> |
| MoCA                            |             |           |           |                |              |
| Sex                             | 0,273       | 0,137     | 1         | 1,99           | 0,051        |
| Age                             | 0,027       | 0,015     | 67        | 1,75           | 0,085        |
| MoCA                            | -0,033      | 0,0262    | 63        | -1,29          | 0,202        |
